# Supplementary material for: Intron retention is a hallmark and spliceosome represents a therapeutic vulnerability in aggressive prostate cancer
Source: PubMed Central journal article supplement (PMC7190674; doi:10.1038/s41467-020-15815-7), 2020-04-29
Supplement: 41467_2020_15815_MOESM2_ESM.pdf [file 41467_2020_15815_MOESM2_ESM.pdf]

## **Description of Additional Supplementary Files**

File Name: Supplementary Data 1

Description: The mutational landscape of 274 SRGs in PCa

File Name: Supplementary Data 2

Description: Summary of RNA-seq datasets used in this study for splicing analyses

File Name: Supplementary Data 3

Description: Summary of statistically significant differentially spliced events (DSEs)

File Name: Supplementary Data 4

Description: Summary of SRG dysregulation

File Name: Supplementary Data 5

Description: Summary of the prognostic association of differentially expressed SRGs

File Name: Supplementary Data 6

Description: DSEs identified in PCa cells and xenografts treated with E7107

File Name: Supplementary Data 7

Description: DEGs identified in PCa cells and xenografts treated with E7107

File Name: Supplementary Data 8

Description: RBP motif analysis of IR

File Name: Supplementary Data 9

Description: List of primers used in this study
